# Supplementary material
Source: PubMed Central journal article supplement (PMC9425700)
Supplement: mmc1.pdf [file mmc1.pdf]

We gratefully acknowledge the following Authors from the Originating laboratories responsible for obtaining the specimens, as well as the Submitting laboratories where the genome data were generated and shared via GISAID, on which this research is based.

All Submitters of data may be contacted directly via [www.gisaid.org](http://www.gisaid.org)

Authors are sorted alphabetically.

Acknowledgement EPI\_SET Identifier: EPI\_SET\_20220406tw

| Accession ID                                                                                                                                                                                                                                                                                                                                                                                                                                                                                                                                                                                                                                                                                                                                                                                                                                                                                                                                                                                                                                                                                                                                                                                                                                                                                                                                                                                                                                                                                                                                                                                                                                                                                                                                                                                                                                                                                                                                                                                                                                                                                                                                                                                                                                                                    | Originating Laboratory | Submitting Laboratory                                            | Authors                                                                                                                                                                                                                                                                                                                                                                                                                             |
|---------------------------------------------------------------------------------------------------------------------------------------------------------------------------------------------------------------------------------------------------------------------------------------------------------------------------------------------------------------------------------------------------------------------------------------------------------------------------------------------------------------------------------------------------------------------------------------------------------------------------------------------------------------------------------------------------------------------------------------------------------------------------------------------------------------------------------------------------------------------------------------------------------------------------------------------------------------------------------------------------------------------------------------------------------------------------------------------------------------------------------------------------------------------------------------------------------------------------------------------------------------------------------------------------------------------------------------------------------------------------------------------------------------------------------------------------------------------------------------------------------------------------------------------------------------------------------------------------------------------------------------------------------------------------------------------------------------------------------------------------------------------------------------------------------------------------------------------------------------------------------------------------------------------------------------------------------------------------------------------------------------------------------------------------------------------------------------------------------------------------------------------------------------------------------------------------------------------------------------------------------------------------------|------------------------|------------------------------------------------------------------|-------------------------------------------------------------------------------------------------------------------------------------------------------------------------------------------------------------------------------------------------------------------------------------------------------------------------------------------------------------------------------------------------------------------------------------|
| EPI_ISL_9433192, EPI_ISL_9433199, EPI_ISL_9433200, EPI_ISL_9433201, EPI_ISL_9433203, EPI_ISL_9433204, EPI_ISL_9433205, EPI_ISL_9433206, EPI_ISL_9433207, EPI_ISL_9433208, EPI_ISL_9433209, EPI_ISL_9433210, EPI_ISL_9433211, EPI_ISL_9433212, EPI_ISL_9433213, EPI_ISL_9433214, EPI_ISL_9433216, EPI_ISL_9433217, EPI_ISL_9433218, EPI_ISL_9433219, EPI_ISL_9433220, EPI_ISL_9433221, EPI_ISL_9433222, EPI_ISL_9433225, EPI_ISL_9433226, EPI_ISL_9433227, EPI_ISL_9433229, EPI_ISL_9433231, EPI_ISL_9433233, EPI_ISL_9433234, EPI_ISL_9433235, EPI_ISL_9433238, EPI_ISL_9433240, EPI_ISL_9433241, EPI_ISL_9433242, EPI_ISL_9433243, EPI_ISL_9433244, EPI_ISL_9433245, EPI_ISL_9433246, EPI_ISL_9433247, EPI_ISL_9433248, EPI_ISL_9433249, EPI_ISL_9433251, EPI_ISL_9433252, EPI_ISL_9433253, EPI_ISL_9433254, EPI_ISL_9433255, EPI_ISL_9433256, EPI_ISL_9433257, EPI_ISL_9433258, EPI_ISL_9433259, EPI_ISL_9433260, EPI_ISL_9433261, EPI_ISL_9433262, EPI_ISL_9433263, EPI_ISL_9433264, EPI_ISL_9433265, EPI_ISL_11514382, EPI_ISL_11514385, EPI_ISL_11514386, EPI_ISL_11514387, EPI_ISL_11514388, EPI_ISL_11514389, EPI_ISL_11514390, EPI_ISL_11514391, EPI_ISL_11514392, EPI_ISL_11514393, EPI_ISL_11514394, EPI_ISL_11514395, EPI_ISL_11514396, EPI_ISL_11514397, EPI_ISL_11514398, EPI_ISL_11514399, EPI_ISL_11514400, EPI_ISL_11514401, EPI_ISL_11514403, EPI_ISL_11514404, EPI_ISL_11514405, EPI_ISL_11514406, EPI_ISL_11514407, EPI_ISL_11514408, EPI_ISL_11514409, EPI_ISL_11514410, EPI_ISL_11514411, EPI_ISL_11514412, EPI_ISL_11514413, EPI_ISL_11514414, EPI_ISL_11514415, EPI_ISL_11514416, EPI_ISL_11514418, EPI_ISL_11514419, EPI_ISL_11514420, EPI_ISL_11514421, EPI_ISL_11514422, EPI_ISL_11514423, EPI_ISL_11514424, EPI_ISL_11514425, EPI_ISL_11514426, EPI_ISL_11514427, EPI_ISL_11514428, EPI_ISL_11514429, EPI_ISL_11514431, EPI_ISL_11514432, EPI_ISL_11514433, EPI_ISL_11514434, EPI_ISL_11514435, EPI_ISL_11514436, EPI_ISL_11514437, EPI_ISL_11514438, EPI_ISL_11514440, EPI_ISL_11514441, EPI_ISL_11514442, EPI_ISL_11514443, EPI_ISL_11514444, EPI_ISL_11514445, EPI_ISL_11514446, EPI_ISL_11514447, EPI_ISL_11514449, EPI_ISL_11514450, EPI_ISL_11514451, EPI_ISL_11514452, EPI_ISL_11514454, EPI_ISL_11514455, EPI_ISL_11514457, EPI_ISL_11514458 | see above              | Laboratório de Microbiologia Molecular -<br>Universidade FEEVALE | Molecular Microbiology Laboratory<br>Alana Witt Hansen; Ana Cristina Sbaraini Mosená; Ana Cristina Sbaraini Mosená.; Fernando Rosado Spiiki; Fagner Henrique Heldt; Juliana Schons Gualarte; Juliane Deise Fleck; Mariana Soares da Silva; Matheus Nunes Weber; Meriane Demoliner; Micheli Filippi; Paula Rodrigues de Almeida; Viviane Girardi.; Vyctoria Malayhka de Abreu Góes Pereira; Vyctoria Malayhka de Abreu Góes Pereira. |
