# Supplementary material
Source: PubMed Central journal article supplement (PMC9425700)
Supplement: mmc2.pdf [file mmc2.pdf]

We gratefully acknowledge the following Authors from the Originating laboratories responsible for obtaining the specimens, as well as the Submitting laboratories where the genome data were generated and shared via GISAID, on which this research is based.

All Submitters of data may be contacted directly via [www.gisaid.org](http://www.gisaid.org)

Authors are sorted alphabetically.

Acknowledgement EPI\_SET Identifier: EPI\_SET\_20220406to

| Accession ID                                                                                                                                                                                                                                                                                                                                                                                          | Originating Laboratory                                        | Submitting Laboratory             | Authors                                                                                                                                                                                                                                                                                                                                                                      |
|-------------------------------------------------------------------------------------------------------------------------------------------------------------------------------------------------------------------------------------------------------------------------------------------------------------------------------------------------------------------------------------------------------|---------------------------------------------------------------|-----------------------------------|------------------------------------------------------------------------------------------------------------------------------------------------------------------------------------------------------------------------------------------------------------------------------------------------------------------------------------------------------------------------------|
| EPI_ISL_9433180, EPI_ISL_9433182, EPI_ISL_9433183, EPI_ISL_9433184, EPI_ISL_9433185, EPI_ISL_9433186, EPI_ISL_9433187, EPI_ISL_9433188, EPI_ISL_9433189, EPI_ISL_9433190, EPI_ISL_9433191, EPI_ISL_9433193, EPI_ISL_9433194, EPI_ISL_9433195, EPI_ISL_9433196, EPI_ISL_9433197, EPI_ISL_9433198, EPI_ISL_9433202, EPI_ISL_9433215, EPI_ISL_9433230, EPI_ISL_9433237, EPI_ISL_9433239, EPI_ISL_9469878 | Laboratório de Microbiologia Molecular - Universidade FEEVALE | Molecular Microbiology Laboratory | Alana Witt Hansen; Ana Cristina Sbaraini Mosena; Ana Cristina Sbaraini Mosena.; Fernando Rosado Spilki; Fágner Henrique Heldt; Juliana Schons Gulate; Juliane Deise Fleck; Mariana Soares da Silva; Matheus Nunes Weber; Meriane Demoliner; Micheli Filippi; Paula Rodrigues de Almeida; Vycctoria Malayhka de Abreu Góes Pereira; Vycctoria Malayhka de Abreu Góes Pereira. |
| see above                                                                                                                                                                                                                                                                                                                                                                                             |                                                               |                                   |                                                                                                                                                                                                                                                                                                                                                                              |
